# Supplementary material
Source: PubMed Central journal article supplement (PMC5392423)
Supplement: NIHMS847671-supplement.pdf [file NIHMS847671-supplement.pdf]

## SUPPLEMENTARY INFORMATION

### Phenformin enhances the efficacy of ERK inhibition in NF1-mutant melanoma

Sebastian Trousil<sup>1,\*</sup>, Shuang Chen<sup>1,2,3,\*</sup>, Chan Mu<sup>1,3,\*</sup>, Fiona M. Shaw<sup>4</sup>, Zhan Yao<sup>5</sup>, Yuping Ran<sup>3</sup>, Tiwari Shakuntala<sup>5</sup>, Taha Merghoub<sup>5</sup>, Dieter Manstein<sup>1</sup>, Neal Rosen<sup>5</sup>, Lewis C. Cantley<sup>6</sup>, Jonathan H. Zippin<sup>4</sup>, Bin Zheng<sup>1</sup>

<sup>1</sup>Cutaneous Biology Research Center, Massachusetts General Hospital and Harvard Medical School, Charlestown, MA, USA;

<sup>2</sup>Department of Dermatology, the First Affiliated Hospital of Chongqing Medical University, Chongqing, China.

<sup>3</sup>Department of Dermatovenereology, West China Hospital, Sichuan University, Chengdu, Sichuan Province, China.

<sup>4</sup>Department of Dermatology, Weill Cornell Medical College, New York, NY, USA

<sup>5</sup>Division of Medicine, Memorial Sloan Kettering Cancer Center, New York, USA

<sup>6</sup>Meyer Cancer Center, Department of Medicine, Weill Cornell Medical College, New York, New York 10065, USA

\* These authors contributed equally to this work.

Corresponding author:

Bin Zheng

Cutaneous Biology Research Center

Massachusetts General Hospital

Harvard Medical School

Building 149, 13th Street, Room 3013

Charlestown, MA 02129

Tel: 617-724-9958

E-mail: bin.zheng@cbr2.mgh.harvard.edu

**Supplementary Table S1:** NF1, BRAF and NRAS mutation status of cell lines, as published by Nissan *et al.*, 2014 or the Cancer Cell Line Encyclopedia (Barretina *et al.*, 2012).

| <b>Cell line</b> | <b>NF1</b>                        | <b>BRAF</b>     | <b>NRAS</b> |
|------------------|-----------------------------------|-----------------|-------------|
| LOXIMVI          | Q1174*                            | V600E,<br>I208V | WT          |
| Mewo             | Q1336*, heterozygous NF1 deletion | WT              | WT          |
| M308             | Q1070*                            | V600E           | WT          |
| SK-Mel-103       | Focal NF1 deletion                | WT              | Q61R        |
| SK-Mel-113       | homozygous deletion               | WT              | WT          |
| SK-Mel-217       | focal intragenic NF1 deletion     | WT              | WT          |
| WM88             | R1306Q                            | V600E           | WT          |
| WM3918           | focal intragenic NF1 deletion     | -               | -           |

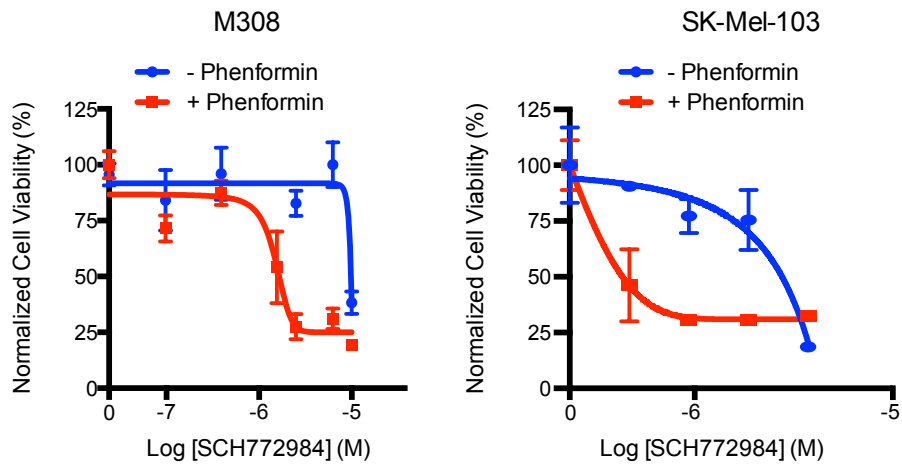

**Supplementary Figure S1:** M308 and SK-Mel-103 cells were treated with varying concentrations of ERKi SCH772984 alone or in combination with 0.25 mM (M308) or 0.1 mM (SK-Mel-103) phenformin. After 72-hour drug treatment, cell proliferation was assessed by DNA-based CyQUANT assay. Cell number was normalized to no drug treatment.

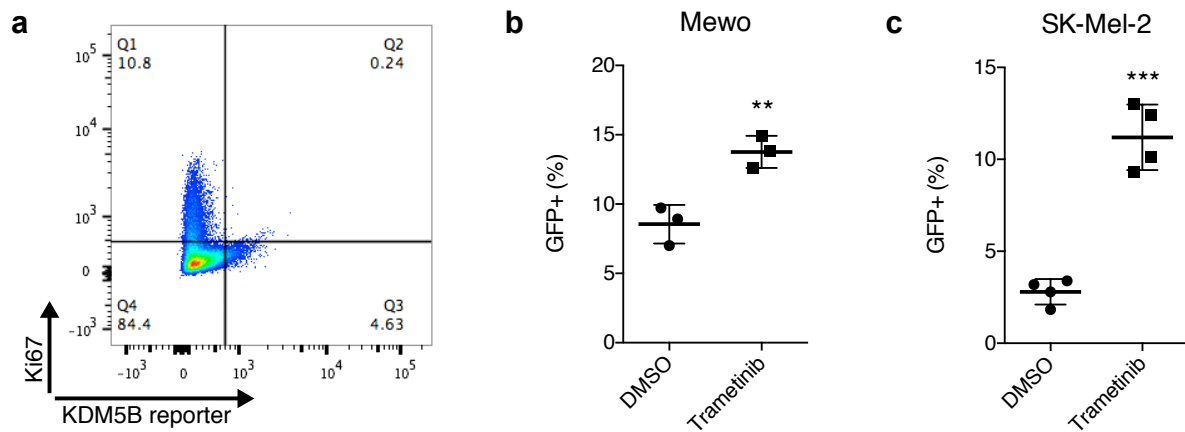

**Supplementary Figure S2: KDM5B-positive cells are slow-cycling and KDM5B expression is induced by MEK inhibition in NF1-mutant and NRAS-mutant melanoma.**

(a) WM115 cells stably expressing the KDM5B reporter construct were stained with proliferation marker Ki67 and subjected to FACS analysis. (b-c) Mewo (NF1-mutant) and SK-Mel-2 (NRAS mutant) cells were treated with MEKi trametinib (1 and 0.1  $\mu$ M for Mewo and SK-Mel-2, respectively) for 72 hours and distribution of KDM5B (GFP)-positive cells analyzed by FACS.
